# Supplementary material
Source: PubMed Central journal article supplement (PMC8738754)
Supplement: 41431_2021_1010_MOESM1_ESM.pdf [file 41431_2021_1010_MOESM1_ESM.pdf]

## SUPPLEMENTARY FIGURES

**Supplementary Figure 1: Predictions of exonic splicing regulator elements of the c.627C>T *TMCI* variant.**

**A**

| Positions (wild type) | Hexamer seq wild type | ESRseq score wild type | Hexamer seq variant | ESRseq score variant | ESRseq score change (variant vs wild type) |
|-----------------------|-----------------------|------------------------|---------------------|----------------------|--------------------------------------------|
| c.619-624             | TTTAG <u>C</u>        | -0.5510                | TTTAG <u>A</u>      | -0.4845              | +0.0665                                    |
| c.620-625             | TTAG <u>CC</u>        | -0.5749                | TTAG <u>AC</u>      | -0.3924              | +0.1825                                    |
| c.621-626             | TAG <u>CCT</u>        | -0.2658                | TAG <u>ACT</u>      | 0                    | +0.2658                                    |
| c.622-627             | AG <u>CCTC</u>        | 0                      | AG <u>ACTC</u>      | 0                    | 0                                          |
| c.623-628             | GC <u>CTCA</u>        | 0                      | GA <u>CTCA</u>      | 0                    | 0                                          |
| c.624-629             | <u>CCTCAT</u>         | 0                      | <u>ACTCAT</u>       | 0                    | 0                                          |
| Total                 |                       | -1.3917                |                     | -0.8769              | <b>+0.5148</b>                             |

**B**

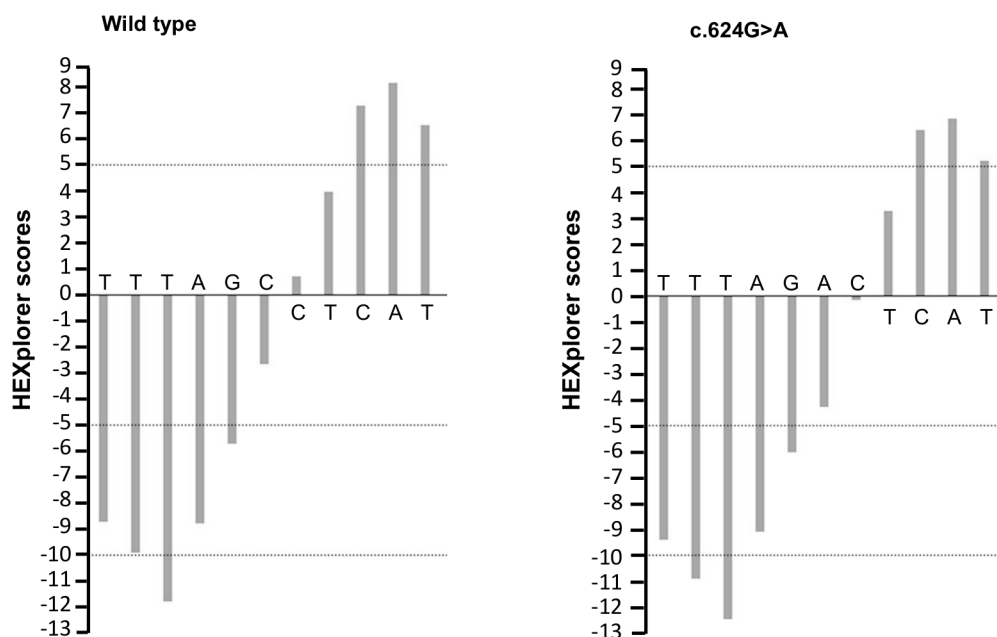

**A)** Data obtained from the HEXoSplice tool. The nucleotide change is indicated with underlined bold font;  $\Delta tESR_{seq}$  score: -1.31. **B)** Graphical presentation of data extracted from the HEXplorer algorithm for the wild type (c.622-632) and mutated sequences;  $\Delta HZ_{EI}$  value: -60.13.

**Supplementary Figure 2: Predictions of exonic splicing regulator elements of the c.630\_632del *TMC1* alteration.**

**A**

| Positions (wild type) | Hexamer seq wild type | ESRseq score wild type | Hexamer seq variant | ESRseq score variant | ESRseq score change (variant vs wild type) |
|-----------------------|-----------------------|------------------------|---------------------|----------------------|--------------------------------------------|
| c.625-630             | CTC <u>ATC</u>        | 0                      | CTCATG              | 0                    |                                            |
| c.626-631             | TCAT <u>CA</u>        | 0                      | TCATGT              | 0                    |                                            |
| c.627-632             | CAT <u>CAT</u>        | 0                      | CATGTT              | 0                    |                                            |
| c.628-633             | AT <u>CATG</u>        | 0                      | ATGTTG              | 0                    |                                            |
| c.629-634             | TCAT <u>GT</u>        | 0                      | TGTTGC              | 0                    |                                            |
| c.630-635             | <u>CATGTT</u>         | 0                      |                     |                      |                                            |
| c.631-636             | <u>ATGTTG</u>         | 0                      |                     |                      |                                            |
| c.632-637             | <u>TGTTGC</u>         | 0                      |                     |                      |                                            |
| Total                 |                       | 0                      |                     | 0                    | <b>0</b>                                   |

**B**

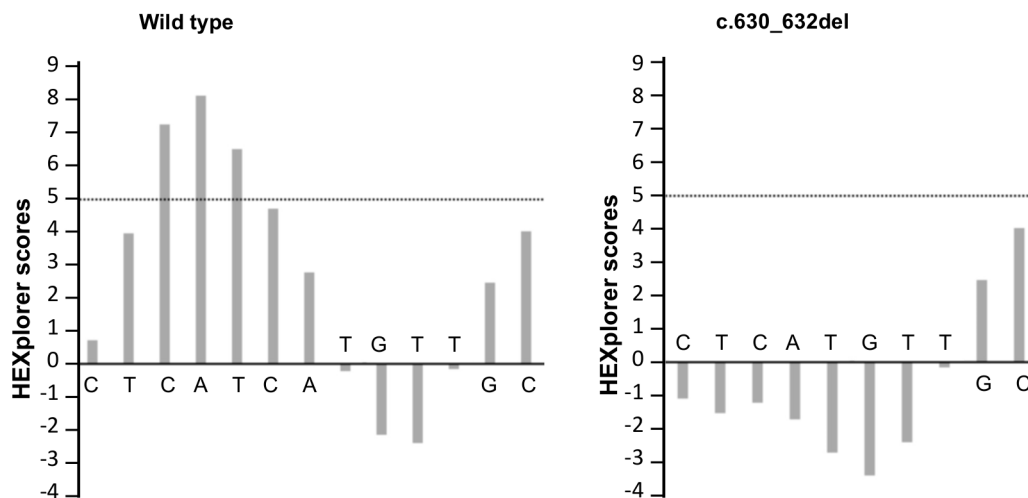

**A)** Data obtained from the HEXoSplice tool. The deletion is indicated with underlined bold font in the wild type sequence;  $\Delta$ tESR<sub>seq</sub> score: 0. **B)** Graphical presentation of data extracted from the HEXplorer algorithm for the wild type (c.625-637) and mutated sequences;  $\Delta$ HZ<sub>EI</sub> value: -43.76.

**Supplementary Figure 3: Predictions of exonic splicing regulator elements of the c.624C>A *TMC1* variant**

**A**

| Positions (wild type) | Hexamer seq wild type | ESRseq score wild type | Hexamer seq variant | ESRseq score variant | ESRseq score change (variant vs wild type) |
|-----------------------|-----------------------|------------------------|---------------------|----------------------|--------------------------------------------|
| c.619-624             | TTTAG <u>C</u>        | -0.5510                | TTTAG <u>A</u>      | -0.4845              | +0.0665                                    |
| c.620-625             | TTAG <u>CC</u>        | -0.5749                | TTAG <u>AC</u>      | -0.3924              | +0.1825                                    |
| c.621-626             | TAG <u>CTC</u>        | -0.2658                | TAG <u>ACT</u>      | 0                    | +0.2658                                    |
| c.622-627             | AG <u>CCTC</u>        | 0                      | AG <u>ACTC</u>      | 0                    | 0                                          |
| c.623-628             | G <u>CCTCA</u>        | 0                      | G <u>ACTCA</u>      | 0                    | 0                                          |
| c.624-629             | <u>CCTCAT</u>         | 0                      | <u>ACTCAT</u>       | 0                    | 0                                          |
| Total                 |                       | -1.3917                |                     | -0.8769              | <b>+0.5148</b>                             |

**B**

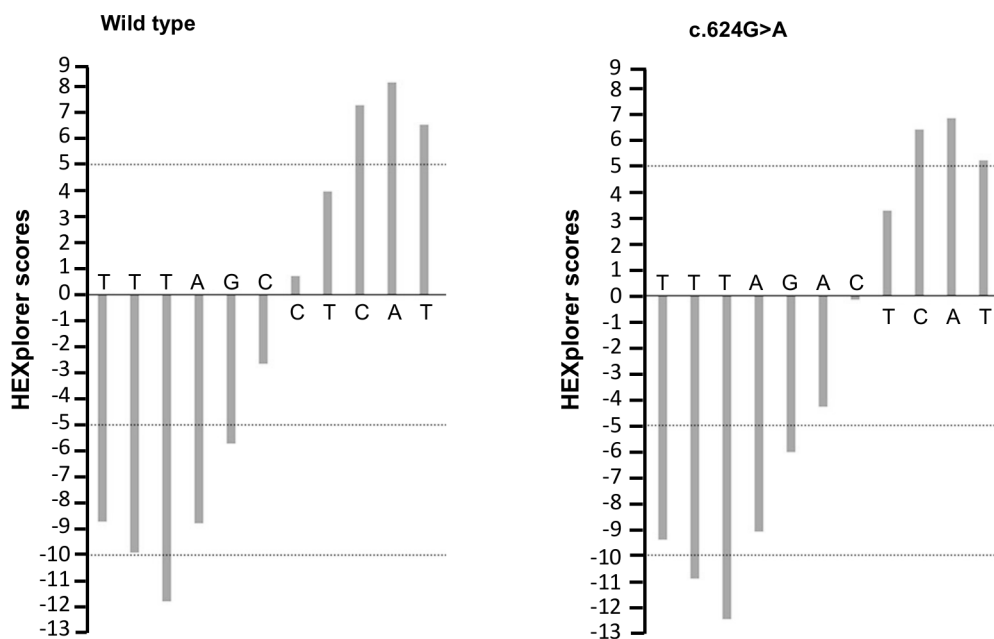

**A)** Data obtained from the HExoSplice tool. The nucleotide change is indicated with underlined bold font;  $\Delta$ ESR<sub>seq</sub> score: +0.51. **B)** Graphical presentation of data extracted from the HExplorer algorithm for the wild type (c.619-629) and mutated sequences;  $\Delta$ HZ<sub>EI</sub> value: -9.82.
